# Supplementary material for: Transcriptome Characterization and Gene Changes Induced by Fusarium solani in Sweetpotato Roots
Source: MDPI journal article supplement (doi:10.3390/genes14050969), 2023-04-25
Supplement: s1 [file s1]

## Supplementary data to this article:

### Additional file 1:

Figure S1. Sample correlation heat map.

### Additional file 2:

Table S1. Data filtering statistics

### Additional file 3:

Figure 2S. Bubble plot of the KEGG pathway enrichment of DEGs. The top 20 with the lowest Q value of enriched pathways for comparisons: A: CK-32 vs. T-6h, B: CK-32 vs. T-24h, C: CK-32 vs. T-3d, D: CK-32 vs. T-5d. Bubble color and size correspond to the Q value and gene number enriched in the pathway. The rich factor indicates the ratio of the number of DEGs mapped to a certain pathway to the total number of genes mapped to this pathway.

### Additional file4:

Table S2 Related genes and pathways in plant-pathogen interaction

Table S1. Data filtering statistics

| Samples | RawData<br>(bp) | CleanData(%)      | Q30                  | Total    | TotalMapped(%)<br>/Sweetpotato | TotalMap<br>ped(%)<br>/Fusarium<br>solani |
|---------|-----------------|-------------------|----------------------|----------|--------------------------------|-------------------------------------------|
| CK-32-1 | 64427836        | 64368904 (99.91%) | 9073817079 (93.89%)  | 63216130 | 48523437 (76.76%)              |                                           |
| CK-32-2 | 67448358        | 67381806 (99.90%) | 9574163424 (94.63%)  | 64493084 | 49919241 (77.40%)              |                                           |
| CK-32-3 | 75132248        | 75007404 (99.83%) | 10455804188 (92.78%) | 73695904 | 56561942 (76.75%)              |                                           |
| T-6h-1  | 72722906        | 72613742 (99.85%) | 10238442215 (93.86%) | 65060974 | 8043131 (12.36%)               | 57.21%                                    |
| T-6h-2  | 64040800        | 63977486 (99.90%) | 9054305795 (94.26%)  | 40119272 | 4785461 (11.93%)               | 56.57%                                    |
| T-6h-3  | 73692006        | 73594512 (99.87%) | 10056287813 (90.98%) | 60484944 | 7615932 (12.59%)               | 57.42%                                    |
| T-24h-1 | 82486622        | 82358066 (99.84%) | 11573702850 (93.54%) | 72035904 | 7532664 (10.46%)               | 0.58%                                     |
| T-24h-2 | 75839274        | 75754808 (99.89%) | 10707651954 (94.13%) | 66444752 | 8941094 (13.46%)               | 0.58%                                     |
| T-24h-3 | 70264758        | 70146802 (99.83%) | 9860246945 (93.55%)  | 62022092 | 6785886 (10.94%)               | 4.58%                                     |
| T-3d-1  | 75006824        | 74896992 (99.85%) | 10475824775 (93.11%) | 74243204 | 57016513 (76.80%)              | 0.59%                                     |
| T-3d-2  | 71971622        | 71857110 (99.84%) | 10000613841 (92.63%) | 70796204 | 54208631 (76.57%)              | 1.68%                                     |
| T-3d-3  | 68745452        | 68459012 (99.58%) | 9636337809 (93.45%)  | 67674158 | 48180955 (71.20%)              | 0.45%                                     |
| T-5d-1  | 76647188        | 76552916 (99.88%) | 10687484001 (92.96%) | 75670110 | 58190196 (76.90%)              | 57.21%                                    |
| T-5d-2  | 78803984        | 78723616 (99.90%) | 11123411184 (94.10%) | 77046624 | 58378032 (75.77%)              | 56.57%                                    |
| T-5d-3  | 66434978        | 66334630 (99.85%) | 9217749586 (92.50%)  | 65710952 | 49970730 (76.05%)              | 57.42%                                    |

Table S2. Related genes and pathways in plant-pathogen interaction

| pathway/<br>describe (K_id)                                                      | comparisons     | Differentially<br>genes/down                                                                                                                                                            | expressed | Differentially<br>genes/up                                                   | expressed |
|----------------------------------------------------------------------------------|-----------------|-----------------------------------------------------------------------------------------------------------------------------------------------------------------------------------------|-----------|------------------------------------------------------------------------------|-----------|
| Fungal PAMP/CPK;<br>calcium-dependent<br>protein kinase<br>(K13412)              | CK-32 vs. T-6h  | G1629, G25763, G27922,<br>G27924, G29161, G3795, G4098,<br>G4116, G44256, G47022                                                                                                        |           | G23385, G23394, G26201,<br>G26202, G26207, G33768,<br>G42600, G44834         |           |
|                                                                                  | CK-32 vs. T-24h | G1629, G4112, G3795, G4098,<br>G3406, G4116, G47022, G25763<br>G3795, G1629, G27922, G27924,<br>G48602, G40200, G4112, G7779,<br>G4116, G27539, G4098, G3271,<br>G3406, G25763, G47022, |           | G26207, G44834, G33768,<br>G23385, G42600, G26202                            |           |
|                                                                                  | CK-32 vs. T-3d  | G3795, G27922, G27924, G1629,<br>G40200, G4112, G4098, G4116,<br>G25763,                                                                                                                |           | G26292, G44834, G26201,<br>G26202, G26207, G23385,<br>G23394, G33768, G42600 |           |
|                                                                                  | CK-32 vs. T-5d  | G3795, G27922, G27924, G1629,<br>G40200, G4112, G4098, G4116,<br>G25763,                                                                                                                |           | G26207, G33768, G42600,<br>G23385                                            |           |
| Fungal PAMP/Rboh;<br>respiratory burst<br>oxidase<br>(K13447)                    | CK-32 vs. T-6h  | G41782, G46408, G46406,<br>G22301, G22322,                                                                                                                                              |           | G225, G3921, G3924,<br>G4567, G47639, G47642,<br>MSTRG.314                   |           |
|                                                                                  | CK-32 vs. T-24h | G46408, G22301, G41782,<br>G46406, G22322,                                                                                                                                              |           | G47642, G3924, G4567,<br>G225, MSTRG.314,<br>G3921, G47639                   |           |
|                                                                                  | CK-32 vs. T-3d  | G41782, G22301, G46406,<br>G22322, G46408, G39844                                                                                                                                       |           | G3924, G47642, G4567,<br>G225, G47639                                        |           |
|                                                                                  | CK-32 vs. T-5d  | G41782,<br>G22301, G22322, G46408, G46406                                                                                                                                               |           | G225, G3921, G3924,<br>G4567, G47642,<br>MSTRG.314                           |           |
| Ca <sup>2+</sup> /CNGC; cyclic<br>nucleotide gated<br>channel, plant<br>(K05391) | CK-32 vs. T-6h  | G28419, G28433, G5820,<br>G36125, G23262, G36119,<br>G42426                                                                                                                             |           | G13410, G10205,<br>G7849, G7852                                              |           |
|                                                                                  | CK-32 vs. T-24h | G28419, G23262                                                                                                                                                                          |           | G13410, G10205, G7852                                                        |           |
|                                                                                  | CK-32 vs. T-3d  | G28419, G23251, G23262,<br>G5820, G42426                                                                                                                                                |           | G7512, G7849, G7852                                                          |           |

---

|                                                                     |                 |                                                                                          |                                       |
|---------------------------------------------------------------------|-----------------|------------------------------------------------------------------------------------------|---------------------------------------|
|                                                                     | CK-32 vs. T-5d  | G5820, G5818                                                                             | G28649                                |
|                                                                     | CK-32 vs. T-6h  | G36840, G34063, G33741                                                                   | G34963, G34971, G35048, G35077        |
| Ca <sup>2+</sup> /CALM;<br>calmodulin<br>(K02183)                   | CK-32 vs. T-24h | G34063, G33741                                                                           | G34963, G34971, G35077, G35048, G5856 |
|                                                                     | CK-32 vs. T-3d  | G36840, G34063, G33741, G35044                                                           | G35077, G34971, G35048                |
|                                                                     | CK-32 vs. T-5d  | G36840, G34063, G33741                                                                   | G34971, G35048, G35077, G16427        |
|                                                                     | CK-32 vs. T-6h  | G5032, G42522, G5074, G19413, G8847, G24929, G26358, G26360, G22517                      | G25638, G25967, G25986, G6338         |
| Ca <sup>2+</sup> /calcium-binding<br>protein CML<br>(K13448)        | CK-32 vs. T-24h | G20662, G19413, G5074, G24929, G26358,                                                   | G25967, G25986, G6338                 |
|                                                                     | CK-32 vs. T-3d  | G5074, G19413, G5032, G24929, G42522, G8847, G25638, G25639, G26358, G1536, G3444, G6128 | -                                     |
|                                                                     | CK-32 vs. T-5d  | G5032, G20662, G5074, G19413, G8847, G24929, G26358, G3444, G25639, G42522               | -                                     |
|                                                                     | CK-32 vs. T-6h  | G6611, G6636, G6639                                                                      | -                                     |
| Ca <sup>2+</sup> /NOA1;<br>nitric-oxide synthase,<br>plant (K13427) | CK-32 vs. T-24h | G6611, G6639                                                                             | -                                     |
|                                                                     | CK-32 vs. T-3d  | G6611, G6636, G6639, G6695                                                               | -                                     |
|                                                                     | CK-32 vs. T-5d  | G6611, G6636, G6639                                                                      | -                                     |

---
